# Supplementary material for: 1,4-Metal migration in a Cp*Rh(iii) complex
Source: Royal Society of Chemistry journal article supplement (doi:10.1039/c3cc46700g), 2013-01-01
Supplement: c3cc46700g.pdf [file c3cc46700g.pdf]

## 1,4-Metal migration at a Cp<sup>\*</sup>Rh(III) complex

Yousuke Ikeda, Koichi Takano, Shintaro Kodama and Youichi Ishii\*

*Department of Applied Chemistry, Faculty of Science and Engineering, Chuo University, 1-13-27*

*Kasuga, Bunkyo-ku, Tokyo 112-8551, Japan*

### Table of Contents

|                                                                                                                                                                                               |            |
|-----------------------------------------------------------------------------------------------------------------------------------------------------------------------------------------------|------------|
| <b>General Considerations.</b>                                                                                                                                                                | <b>S2</b>  |
| <b>Synthesis of [Cp<sup>*</sup>Rh{o-C<sub>6</sub>H<sub>4</sub>C(Me)=CHPh}(PPh<sub>3</sub>)] [BAr<sup>F</sup><sub>4</sub>] (2a).</b>                                                           | <b>S2</b>  |
| <b>Synthesis of [Cp<sup>*</sup>Rh{o-C<sub>6</sub>H<sub>4</sub>C(Et)=CHEt}(PPh<sub>3</sub>)] [BAr<sup>F</sup><sub>4</sub>] (2b).</b>                                                           | <b>S2</b>  |
| <b>Synthesis of [Cp<sup>*</sup>Rh{o-C<sub>6</sub>H<sub>4</sub>C(Ph)=CHPh}(PPh<sub>3</sub>)] [BAr<sup>F</sup><sub>4</sub>] (2c).</b>                                                           | <b>S3</b>  |
| <b>Synthesis of [Cp<sup>*</sup>Rh{o-C<sub>6</sub>H<sub>4</sub>C(Me)=CHPh}(PMe<sub>3</sub>)] [BAr<sup>F</sup><sub>4</sub>] (5a).</b>                                                           | <b>S3</b>  |
| <b>Synthesis of [Cp<sup>*</sup>Rh{o-C<sub>6</sub>H<sub>4</sub>C(Et)=CHEt}(PMe<sub>3</sub>)] [BAr<sup>F</sup><sub>4</sub>] (5b).</b>                                                           | <b>S3</b>  |
| <b>Synthesis of [Cp<sup>*</sup>Rh{o-C<sub>6</sub>H<sub>4</sub>C(Ph)=CHPh}(PMe<sub>3</sub>)]·0.5C<sub>2</sub>H<sub>4</sub>Cl<sub>2</sub> (5c·0.5C<sub>2</sub>H<sub>4</sub>Cl<sub>2</sub>).</b> | <b>S4</b>  |
| <b>Synthesis of [Cp<sup>*</sup>Rh{C(COC<sub>6</sub>H<sub>4</sub>Me-<i>p</i>)=CPh<sub>2</sub>}(PPh<sub>3</sub>)] [BAr<sup>F</sup><sub>4</sub>] (6).</b>                                        | <b>S4</b>  |
| <b>Synthesis of [Cp<sup>*</sup>RhCl(Me)(PPh<sub>3</sub>)]·0.5CH<sub>2</sub>Cl<sub>2</sub> (7·0.5CH<sub>2</sub>Cl<sub>2</sub>).</b>                                                            | <b>S5</b>  |
| <b>Reaction of 7·0.5CH<sub>2</sub>Cl<sub>2</sub> with NaBAr<sup>F</sup><sub>4</sub> and PhC≡CPh</b>                                                                                           | <b>S5</b>  |
| <b>Observation of 3c</b>                                                                                                                                                                      | <b>S6</b>  |
| <b>Figure S1. Full <sup>1</sup>H NMR spectrum of a mixture of 2c and 3c.</b>                                                                                                                  | <b>S6</b>  |
| <b>Kinetic Experiment.</b>                                                                                                                                                                    | <b>S7</b>  |
| <b>Figure S2. Plot of <i>ln</i> [3c]/[3c<sub>0</sub>] versus time for the conversion of 3c to 2c at 25 °C.</b>                                                                                | <b>S7</b>  |
| <b>Figure S3. Plot of <i>ln</i> [3c-<i>d</i><sub>5</sub>]/[3c-<i>d</i><sub>5 0</sub>] versus time for the conversion of 3c-<i>d</i><sub>5</sub> to 2c-<i>d</i><sub>5</sub> at 25 °C.</b>      | <b>S8</b>  |
| <b>X-ray Diffraction Studies.</b>                                                                                                                                                             | <b>S8</b>  |
| <b>Table S1. X-ray Crystallographic Data for 2a, 5a, and 6.</b>                                                                                                                               | <b>S9</b>  |
| <b>Figure S4. ORTEP drawing of 5a.</b>                                                                                                                                                        | <b>S10</b> |
| <b>Figure S5. ORTEP drawing of 6.</b>                                                                                                                                                         | <b>S10</b> |
| <b>References</b>                                                                                                                                                                             | <b>S11</b> |

**General Considerations.** All manipulations were carried out under an argon atmosphere by using standard Schlenk techniques unless otherwise stated. 1,2-Dichloroethane ( $\text{C}_2\text{H}_4\text{Cl}_2$ ) was dried and distilled over  $\text{P}_4\text{O}_{10}$ , degassed and stored under an argon atmosphere. The other solvents (anhydrous grade) were purchased from Sigma-Aldrich and purged with argon before use. 1-phenyl-1-propyne, 3-hexyne, diphenylacetylene and  $\text{MeMgCl}$  (3M in THF) were purchased from Sigma-Aldrich and used as received.  $[\text{Cp}^*\text{RhCl}(\text{Ph})(\text{PPh}_3)]$  (**1**),<sup>1</sup>  $[\text{Cp}^*\text{RhCl}(\text{Ph})(\text{PMe}_3)]$  (**4**),<sup>1</sup>  $[\text{Cp}^*\text{RhCl}_2(\text{PPh}_3)]$ ,<sup>1</sup>  $\text{NaBAR}^{\text{F}}_4 \cdot 2\text{H}_2\text{O}$ <sup>2</sup> and 1-(4-tolyl)-3-phenyl-2-propyn-1-one<sup>3</sup> were synthesized according to the literature.  $^1\text{H}$  (500 MHz),  $^{13}\text{C}\{^1\text{H}\}$  (126 MHz), and  $^{31}\text{P}\{^1\text{H}\}$  (202 MHz) NMR spectra were recorded on a JEOL ECA-500 spectrometer. Chemical shifts are reported in  $\delta$ , referenced to residual  $^1\text{H}$  and  $^{13}\text{C}$  signals of deuterated solvents as internal standards or to the  $^{31}\text{P}$  signal of  $\text{PPh}_3$  ( $\delta -5.65$ ) as an external standard. IR spectra were recorded on a JASCO FT/IR-4200 spectrometer by using KBr pellets. Elemental analyses were performed on a Perkin Elmer 2400 series II CHN analyzer. Amounts of the solvent molecules in the crystals were determined not only by elemental analyses but also by  $^1\text{H}$  NMR spectroscopy.

**$[\text{Cp}^*\text{Rh}\{\text{o-C}_6\text{H}_4\text{C}(\text{Me})=\text{CHPh}\}(\text{PPh}_3)][\text{BAR}^{\text{F}}_4]$  (**2a**).** A mixture of  $[\text{Cp}^*\text{RhCl}(\text{Ph})(\text{PPh}_3)]$  (**1**; 45.5 mg, 0.074 mmol),  $\text{NaBAR}^{\text{F}}_4 \cdot 2\text{H}_2\text{O}$  (76.9 mg, 0.083 mmol) and 1-phenyl-1-propyne (50  $\mu\text{L}$ , 47.0 mg, 0.405 mmol, 5 equiv) in  $\text{C}_2\text{H}_4\text{Cl}_2$  (2 mL) was stirred at 25 °C for few minutes. The resulting dark red suspension was filtered through a plug of Celite, and the plug was rinsed with  $\text{C}_2\text{H}_4\text{Cl}_2$ . The combined filtrate was concentrated in vacuo and layered with hexane to give **2a** (86.6 mg, 0.056 mmol, 76% yield) as dark red crystals.  $^{31}\text{P}\{^1\text{H}\}$  NMR ( $\text{CDCl}_3$ ):  $\delta$  35.5 (d,  $J_{\text{RhP}} = 161$  Hz,  $\text{PPh}_3$ ).  $^1\text{H}$  NMR ( $\text{CDCl}_3$ ):  $\delta$  7.71–6.74 (m, 36H, Ar), 2.33 (s, 3H,  $\text{CH}_3$ ), 1.10 (d,  $J = 2.3$  Hz, 15H,  $\text{Cp}^*$ ), 1.06 (t,  $J_{\text{RhH}} = {}^2J_{\text{PH}} = 10.3$  Hz, 1H,  $\text{C}=\text{CHPh}$ ). Selected  $^{13}\text{C}\{^1\text{H}\}$  NMR data ( $\text{CDCl}_3$ ):  $\delta$  166.7 (s,  $\text{o-C}_6\text{H}_4\text{C}(\text{Me})=\text{C}$ ), 97.5 (dd,  $J = 6.1, 3.0$  Hz,  $\text{C}=\text{CHPh}$ ), 21.0 (s,  $\text{CH}_3$ ), 9.06 (s,  $\text{CH}_3$  of  $\text{Cp}^*$ ). Anal. Calcd for  $\text{C}_{75}\text{H}_{55}\text{BF}_{24}\text{PRh}$  (**2a**): C, 57.86; H, 3.56. Found: C, 57.58; H, 3.44.

**$[\text{Cp}^*\text{Rh}\{\text{o-C}_6\text{H}_4\text{C}(\text{Et})=\text{CHEt}\}(\text{PPh}_3)][\text{BAR}^{\text{F}}_4]$  (**2b**).** This compound was synthesized from **1** (26.3 mg, 0.043 mmol),  $\text{NaBAR}^{\text{F}}_4 \cdot 2\text{H}_2\text{O}$  (42.3 mg, 0.046 mmol) and 3-hexyne (25  $\mu\text{L}$ , 0.225 mmol) by a

procedure similar to that for the synthesis of **2a** except that Et<sub>2</sub>O/hexane was used as the solvent for recrystallization. Dark red crystals (50.6 mg, 0.033 mmol, 77% yield). <sup>31</sup>P{<sup>1</sup>H} NMR (CDCl<sub>3</sub>): δ 37.0 (d, *J*<sub>RhP</sub> = 159 Hz, PPh<sub>3</sub>). <sup>1</sup>H NMR (CDCl<sub>3</sub>): δ 7.70–6.62 (m, 31H, Ar), 2.66–2.61 (m, 2H, C=CHCH<sub>2</sub>CH<sub>3</sub> and *o*-C<sub>6</sub>H<sub>4</sub>C(CH<sub>2</sub>CH<sub>3</sub>)=C), 2.52–2.48 (m, 1H, *o*-C<sub>6</sub>H<sub>4</sub>C(CH<sub>2</sub>CH<sub>3</sub>)=C), 1.81–1.77 (m, 1H, C=CHCH<sub>2</sub>), 1.26 (d, *J* = 1.7 Hz, 15H, Cp\*), 1.15 (t, *J* = 7.4 Hz, 3H, *o*-C<sub>6</sub>H<sub>4</sub>C(CH<sub>2</sub>CH<sub>3</sub>)=C), 0.34 (t, *J* = 7.4 Hz, 3H, C=CHCH<sub>2</sub>CH<sub>3</sub>), -0.34 (m, 1H, C=CHCH<sub>2</sub>CH<sub>3</sub>). Selected <sup>13</sup>C{<sup>1</sup>H} NMR data (CDCl<sub>3</sub>): δ 171.8 (s, *o*-C<sub>6</sub>H<sub>4</sub>C(CH<sub>2</sub>CH<sub>3</sub>)=C), 98.4 (m, C=CHCH<sub>2</sub>CH<sub>3</sub>), 25.9 (s, *o*-C<sub>6</sub>H<sub>4</sub>C(CH<sub>2</sub>CH<sub>3</sub>)=C), 23.9 (s, C=CHCH<sub>2</sub>CH<sub>3</sub>), 13.8 (s, *o*-C<sub>6</sub>H<sub>4</sub>C(CH<sub>2</sub>CH<sub>3</sub>)=C), 13.6 (s, C=CHCH<sub>2</sub>CH<sub>3</sub>), 9.15 (s, CH<sub>3</sub> of Cp\*). Anal. Calcd for C<sub>72</sub>H<sub>57</sub>BF<sub>24</sub>PRh (**2b**): C, 56.79; H, 3.77. Found: C, 56.51; H, 3.60.

**[Cp\*Rh{*o*-C<sub>6</sub>H<sub>4</sub>C(Ph)=CHPh}(PPh<sub>3</sub>)] [BAr<sup>F</sup><sub>4</sub>] (**2c**).** This compound was synthesized from **1** (33.3 mg, 0.054 mmol), NaBAr<sup>F</sup><sub>4</sub>·2H<sub>2</sub>O (58.0 mg, 0.063 mmol) and diphenylacetylene (25.0 mg, 0.140 mmol) by a procedure similar to that for the synthesis of **2a** except that the reaction was performed for 5 h and Et<sub>2</sub>O/hexane was used as the solvent for recrystallization. Dark red crystals (66.8 mg, 0.041 mmol, 76% yield). <sup>31</sup>P{<sup>1</sup>H} NMR (CDCl<sub>3</sub>): δ 36.4 (d, *J*<sub>RhP</sub> = 161 Hz, PPh<sub>3</sub>). <sup>1</sup>H NMR (CDCl<sub>3</sub>): δ 7.71–6.44 (m, 41H, Ar), 1.16 (d, *J* = 2.3 Hz, 15H, Cp\*), 0.72 (t, *J*<sub>RhH</sub> = <sup>2</sup>*J*<sub>PH</sub> = 10.3 Hz, 1H, C=CHPh). Selected <sup>13</sup>C{<sup>1</sup>H} NMR data (CDCl<sub>3</sub>): δ 167.1 (s, *o*-C<sub>6</sub>H<sub>4</sub>C(Ph)=C), 100.0 (dd, *J* = 6.6, 2.5 Hz, C=CHPh), 9.04 (s, CH<sub>3</sub> of Cp\*). Anal. Calcd for C<sub>80</sub>H<sub>57</sub>BF<sub>24</sub>PRh (**2c**): C, 59.35; H, 3.55. Found: C, 58.98; H, 3.44.

**[Cp\*Rh{*o*-C<sub>6</sub>H<sub>4</sub>C(Me)=CHPh}(PMe<sub>3</sub>)] [BAr<sup>F</sup><sub>4</sub>] (**5a**).** This compound was synthesized from **4** (23.3 mg, 0.055 mmol), NaBAr<sup>F</sup><sub>4</sub>·2H<sub>2</sub>O (62.4 mg, 0.068 mmol) and 1-phenyl-1-propyne (30 μl, 0.243 mmol) by a procedure similar to that for the synthesis of **2a**. Dark red crystals (67.1 mg, 0.049 mmol, 90% yield). <sup>31</sup>P{<sup>1</sup>H} NMR (CDCl<sub>3</sub>): δ -2.57 (d, *J*<sub>RhP</sub> = 156 Hz, PMe<sub>3</sub>). <sup>1</sup>H NMR (CDCl<sub>3</sub>): δ 7.71 (br, 8H, BAr<sup>F</sup><sub>4</sub>), 7.55–7.53 (m, 5H, Ar and BAr<sup>F</sup><sub>4</sub>), 7.45–7.20 (m, 8H, Ar), 2.45 (s, 3H, CH<sub>3</sub>), 1.37 (d, *J* = 10.3 Hz, 9H, P(CH<sub>3</sub>)<sub>3</sub>), 1.35 (d, *J* = 2.3 Hz, 15H, Cp\*), 0.87 (t, *J*<sub>RhH</sub> = <sup>2</sup>*J*<sub>PH</sub> = 10.3 Hz, 1H, C=CHPh). Selected <sup>13</sup>C{<sup>1</sup>H} NMR data (CDCl<sub>3</sub>): δ 167.4 (s, *o*-C<sub>6</sub>H<sub>4</sub>C(CH<sub>3</sub>)=C), 95.3 (br, C=CHPh),

21.5 (s, *o*-C<sub>6</sub>H<sub>4</sub>C(CH<sub>3</sub>)=C), 15.7 (d, *J*<sub>CP</sub> = 33.6 Hz, P(CH<sub>3</sub>)<sub>3</sub>), 9.44 (s, CH<sub>3</sub> of Cp\*). Anal. Calcd for C<sub>60</sub>H<sub>49</sub>BF<sub>24</sub>PRh (**5a**): C, 52.58; H, 3.60. Found: C, 52.58; H, 3.35.

[Cp\*Rh{*o*-C<sub>6</sub>H<sub>4</sub>C(Et)=CHEt}(PMe<sub>3</sub>)][BARF<sub>4</sub>] (**5b**). This compound was synthesized from **4** (24.0 mg, 0.056 mmol), NaBARF<sub>4</sub>·2H<sub>2</sub>O (57.0 mg, 0.062 mmol) and 3-hexyne (32 μl, 0.288 mmol) by a procedure similar to that for the synthesis of **2a**. Red crystals (59.3 mg, 0.044 mmol, 79% yield). <sup>31</sup>P{<sup>1</sup>H} NMR (CDCl<sub>3</sub>): δ 3.62 (d, <sup>2</sup>*J*<sub>RhP</sub> = 147 Hz, PMe<sub>3</sub>). <sup>1</sup>H NMR (CDCl<sub>3</sub>): δ 7.71 (br, 8H, BARF<sub>4</sub>), 7.54 (br, 4H, BARF<sub>4</sub>), 7.14–7.04 (m, 4H, Ar), 2.64, 2.31 (m, 1H each, *o*-C<sub>6</sub>H<sub>4</sub>C(CH<sub>2</sub>CH<sub>3</sub>)=C), 2.15 (m, 1H, C=CHCH<sub>2</sub>CH<sub>3</sub>), 1.94 (m, 1H, C=CHCH<sub>2</sub>CH<sub>3</sub>), 1.76 (m, 1H, C=CHCH<sub>2</sub>CH<sub>3</sub>), 1.56 (d, *J* = 2.9 Hz, 15H, Cp\*), 1.30 (t, *J* = 8.0 Hz, 3H, *o*-C<sub>6</sub>H<sub>4</sub>C(CH<sub>2</sub>CH<sub>3</sub>)=C), 1.27 (d, *J* = 9.7 Hz, P(CH<sub>3</sub>)<sub>3</sub>), 1.02 (t, *J* = 7.4 Hz, 3H, C=CHCH<sub>2</sub>CH<sub>3</sub>). Selected <sup>13</sup>C{<sup>1</sup>H} NMR data (CDCl<sub>3</sub>): δ 90.0 (br, C=CHCH<sub>2</sub>CH<sub>3</sub>), 26.8 (s, *o*-C<sub>6</sub>H<sub>4</sub>C(CH<sub>2</sub>CH<sub>3</sub>)=C), 22.9 (s, C=CHCH<sub>2</sub>CH<sub>3</sub>), 15.3 (d, *J*<sub>CP</sub> = 34.8 Hz, P(CH<sub>3</sub>)<sub>3</sub>), 15.2 (s, *o*-C<sub>6</sub>H<sub>4</sub>C(CH<sub>2</sub>CH<sub>3</sub>)=C), 14.2 (s, C=CHCH<sub>2</sub>CH<sub>3</sub>), 9.52 (s, CH<sub>3</sub> of Cp\*). Anal. Calcd for C<sub>57</sub>H<sub>51</sub>BF<sub>24</sub>PRh (**5b**): C, 51.22; H, 3.85. Found: C, 51.23; H, 3.67.

[Cp\*Rh{*o*-C<sub>6</sub>H<sub>4</sub>C(Ph)=CHPh}(PMe<sub>3</sub>)][BARF<sub>4</sub>]·0.5C<sub>2</sub>H<sub>4</sub>Cl<sub>2</sub> (**5c**·0.5C<sub>2</sub>H<sub>4</sub>Cl<sub>2</sub>). This compound was synthesized from **4** (23.2 mg, 0.054 mmol), NaBARF<sub>4</sub>·2H<sub>2</sub>O (60.2 mg, 0.065 mmol) and diphenylacetylene (48.5 mg, 0.272 mmol) by a procedure similar to that of **2a**. Dark red crystals (74.3 mg, 0.050 mmol, 92% yield). <sup>31</sup>P{<sup>1</sup>H} NMR (CDCl<sub>3</sub>): δ -2.99 (d, *J*<sub>RhP</sub> = 156 Hz, PMe<sub>3</sub>). <sup>1</sup>H NMR (CDCl<sub>3</sub>): δ 7.72 (br, 8H, BARF<sub>4</sub>), 7.54 (br, 4H, BARF<sub>4</sub>), 7.45–6.80 (m, 14H, Ar), 1.50 (d, *J* = 10.3 Hz, 9H, P(CH<sub>3</sub>)<sub>3</sub>), 1.34 (d, *J* = 2.3 Hz, 15H, Cp\*), 0.38 (t, *J*<sub>RhH</sub> = <sup>2</sup>*J*<sub>PH</sub> = 11.2 Hz, 1H, C=CHPh). Selected <sup>13</sup>C{<sup>1</sup>H} NMR data (CDCl<sub>3</sub>): δ 168.8 (s, *o*-C<sub>6</sub>H<sub>4</sub>C(Ph)=C), 97.2 (dd, *J* = 7.2, 2.4 Hz, C=CHPh), 15.7 (d, *J*<sub>CP</sub> = 33.6 Hz, P(CH<sub>3</sub>)<sub>3</sub>), 9.49 (s, CH<sub>3</sub> of Cp\*). Anal. Calcd for C<sub>66</sub>H<sub>53</sub>BClF<sub>24</sub>PRh (**5c**·0.5C<sub>2</sub>H<sub>4</sub>Cl<sub>2</sub>): C, 53.48; H, 3.60. Found: C, 53.84; H, 3.46.

[Cp\*Rh{C(COC<sub>6</sub>H<sub>4</sub>Me-*p*)=CPh<sub>2</sub>}(PPh<sub>3</sub>)][BARF<sub>4</sub>] (**6**). A mixture of [Cp\*RhCl(Ph)(PPh<sub>3</sub>)] (**1**; 26.6 mg, 0.043 mmol), NaBARF<sub>4</sub>·2H<sub>2</sub>O (45.0 mg, 0.049 mmol) and 1-(4-tolyl)-3-phenyl-2-propyn-1-one (40.0 mg, 0.182 mmol) in C<sub>2</sub>H<sub>4</sub>Cl<sub>2</sub> (2 mL) was stirred at 25 °C for few minutes. The resulting red suspension was filtered through a plug of Celite, and the plug was

rinsed with  $\text{C}_2\text{H}_4\text{Cl}_2$ . The combined filtrate was dried in vacuo, and the residue was recrystallized from toluene/hexanes to give **6** (59.6 mg, 0.036 mmol, 83% yield) as red crystals.  $^{31}\text{P}\{^1\text{H}\}$  NMR ( $\text{CDCl}_3$ ):  $\delta$  38.1 (d,  $^2J_{\text{RhP}} = 161$  Hz,  $\text{PPh}_3$ ).  $^1\text{H}$  NMR ( $\text{CDCl}_3$ ):  $\delta$  7.70–6.52 (m, 41H, Ar), 2.18 (s, 3H, Me), 1.17 (d,  $J = 2.9$  Hz, 15H,  $\text{Cp}^*$ ). Selected  $^{13}\text{C}\{^1\text{H}\}$  NMR data ( $\text{CDCl}_3$ ):  $\delta$  208.1 (s,  $\text{C}=\text{O}$ ), 21.4 (s,  $\text{CH}_3$ ), 8.95 (s,  $\text{CH}_3$  of  $\text{Cp}^*$ ). IR ( $\text{cm}^{-1}$ ): 1608 (m,  $\nu_{\text{C}=\text{O}}$ ). Anal. Calcd for  $\text{C}_{82}\text{H}_{59}\text{BF}_{24}\text{OPRh}$  (**6**): C, 59.29; H, 3.58. Found: C, 59.17; H, 3.47.

**$[\text{Cp}^*\text{RhCl}(\text{Me})(\text{PPh}_3)] \cdot 0.5\text{CH}_2\text{Cl}_2$  (**7**·0.5 $\text{CH}_2\text{Cl}_2$ ).** The following procedure is modified from the preparation method originally reported by Blum.<sup>4</sup>  $[\text{Cp}^*\text{RhCl}_2(\text{PPh}_3)]$  (300 mg, 0.525 mmol) was suspended in anhydrous THF (20 mL), and the suspension was cooled to  $-40$  °C. A THF solution of  $\text{MeMgCl}$  (0.53 mL of 3 M solution, 1.59 mmol, 3 equiv) was added dropwise to the suspension by using an airtight syringe. The reaction mixture was stirred at  $-40$  °C for 15 min, warmed to room temperature, and stirring was continued until the suspension became an orange solution (almost 20 min). Then saturated aqueous  $\text{NH}_4\text{Cl}$  solution (0.2 mL) was added to quench unreacted Grignard reagent, and the solvent was removed in vacuo. The product was extracted with  $\text{CH}_2\text{Cl}_2$  and filtered through a plug of Celite, and the plug was rinsed with  $\text{CH}_2\text{Cl}_2$ . Column chromatography on silica (4% THF– $\text{CH}_2\text{Cl}_2$ ) gave the desired complex as the first orange band. Recrystallization from  $\text{CH}_2\text{Cl}_2$ /hexane afforded pure **7**·0.5 $\text{CH}_2\text{Cl}_2$  (167.6 mg, 0.282 mmol, 54% yield) as orange needles.  $^1\text{H}$  NMR ( $\text{CDCl}_3$ ):  $\delta$  7.63–7.61 (m, 6H, Ph), 7.36–7.33 (br, 9H, Ph), 1.31 (d  $J = 2.3$  Hz, 15H,  $\text{Cp}^*$ ), 0.87 (dd,  $J = 6.6, 2.0$  Hz, 3H,  $\text{CH}_3$ ).  $^{31}\text{P}\{^1\text{H}\}$  NMR ( $\text{CDCl}_3$ ):  $\delta$  40.2 (d,  $J = 165.7$  Hz,  $\text{PPh}_3$ ).  $^{13}\text{C}\{^1\text{H}\}$  NMR ( $\text{CDCl}_3$ ):  $\delta$  134.5 (d,  $J = 9.6$  Hz, Ph), 133.2 (d,  $J = 43.2$  Hz, Ph), 129.9 (d,  $J = 2.4$  Hz, Ph), 128.1 (d,  $J = 9.6$  Hz, Ph), 99.1 (t,  $J_{\text{RhC}} = ^2J_{\text{CP}} = 4.2$  Hz,  $\text{Cp}^*$ ), 8.58 (s,  $\text{CH}_3$  of  $\text{Cp}^*$ ), 1.72 (dd,  $J = 23.4, 15.0$  Hz,  $\text{CH}_3$ ). Anal. Calcd for  $\text{C}_{29.5}\text{H}_{34}\text{Cl}_2\text{PRh}$ : C, 59.71; H, 5.78. Found: C, 59.74; H, 5.63.

**Reaction of **7**·0.5 $\text{CH}_2\text{Cl}_2$  with  $\text{NaBAr}^{\text{F}}_4$  and  $\text{PhC}\equiv\text{CPh}$**  A mixture of **7**·0.5 $\text{CH}_2\text{Cl}_2$  (22.7 mg, 0.038 mmol),  $\text{NaBAr}^{\text{F}}_4 \cdot 2\text{H}_2\text{O}$  (36.2 mg, 0.039 mmol) and diphenylacetylene (20.5 mg, 0.115 mmol, 3 equiv) in  $\text{C}_2\text{H}_4\text{Cl}_2$  (2 mL) was stirred at  $25$  °C for 21 h. The resulting dark red suspension was filtered through a plug of Celite, and the plug was rinsed with  $\text{C}_2\text{H}_4\text{Cl}_2$ . The combined filtrate was

concentrated in vacuo, and the solution was added hexane to give **2a** (42.3 mg, 0.027 mmol, 71% yield) as dark red crystals.

**Observation of 3c.** A mixture of **1** (28.6 mg, 0.047 mmol), NaBAR<sup>F</sup><sub>4</sub>·2H<sub>2</sub>O (47.2 mg, 0.051 mmol) and diphenylacetylene (26.1 mg, 0.146 mmol, 3 equiv) in C<sub>2</sub>H<sub>4</sub>Cl<sub>2</sub> (2 mL) was stirred at 25 °C for 30 min. The resulting dark red suspension was filtered through a plug of Celite, and the plug was rinsed with C<sub>2</sub>H<sub>4</sub>Cl<sub>2</sub>. The combined filtrate was dried in vacuo and washed with hexane (2 mL × 3). The singal of **3c** was observed from the <sup>31</sup>P{<sup>1</sup>H} and <sup>1</sup>H NMR spectrum of the CDCl<sub>3</sub> solution of the residue. When similar reaction was performed by using **1-d<sub>5</sub>**, the diagnostic signal of **3c** (δ 5.31), which was attributed to the agostic ortho protons of the phenyl substituent, was not observed in <sup>1</sup>H NMR.

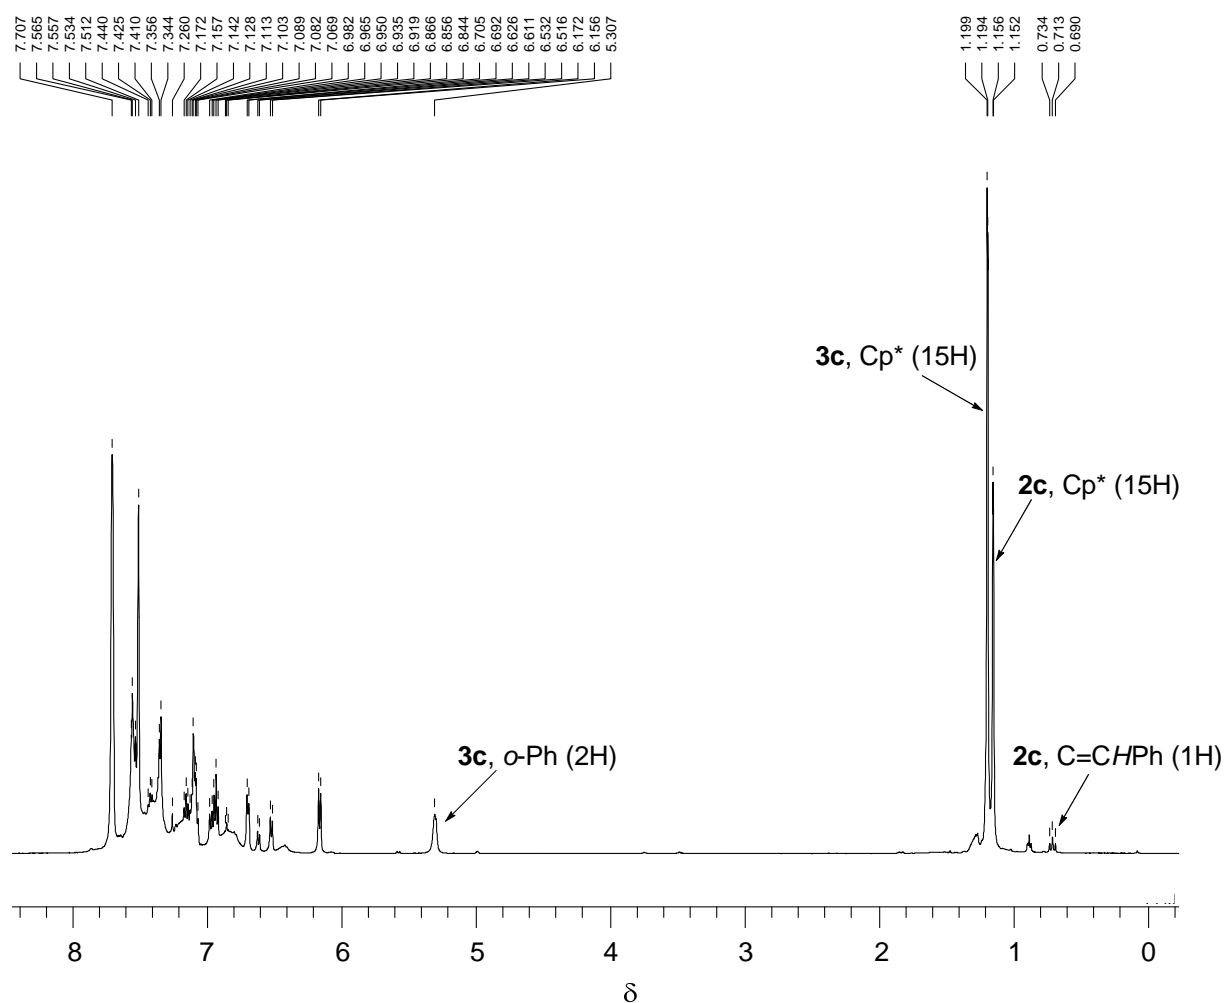

**Figure S1.** Full <sup>1</sup>H NMR spectrum of a mixture of **2c** and **3c** (**2c**:**3c** = 0.45:1)

**Kinetic Experiment.** A C<sub>2</sub>H<sub>4</sub>Cl<sub>2</sub> solution (1 mL) containing **1** (16.7 mg, 0.027 mmol) NaBAr<sup>F</sup><sub>4</sub> (28.0 mg, 0.030 mmol) and ca. 3 equiv of diphenylacetylene (15.0 mg, 0.084 mmol) was transferred to an NMR tube under an atmosphere of argon. The sample was kept at 25 °C, and the reaction was monitored by means of <sup>31</sup>P{<sup>1</sup>H} NMR. Throughout the measurement, two distinct doublet signals were observed, which were assigned as complexes **2c** (δ 36.4) and **3c** (δ 33.2). The ratios of these complexes were determined on the basis of the relative intensities of the <sup>31</sup>P{<sup>1</sup>H} NMR signals, and the apparent first-order rate constant for the isomerisation of **3c** ( $k_H = 1.63 \times 10^{-4} \text{ s}^{-1}$ ) was obtained from the time-conversion plot (Figure S2). The  $k_D$  value ( $k_D = 0.50 \times 10^{-4} \text{ s}^{-1}$ , Figure S3) was obtained from a similar reaction using a C<sub>2</sub>H<sub>4</sub>Cl<sub>2</sub> solution (1 mL) containing **1-d**<sub>5</sub> (17.0 mg, 0.028 mmol), NaBAr<sup>F</sup><sub>4</sub> (28.5 mg, 0.031 mmol) and ca. 3 equiv of diphenylacetylene (15.0 mg, 0.084 mmol). The rate constant ratio  $k_H/k_D$  (25 °C) was determined to be 3.3. Primary KIE ( $k_H/k_D$ ) values of 2.1–4.2 have been reported for Cp\*Rh(III)-catalyzed *ortho* C–H activation of arenes.<sup>5</sup>

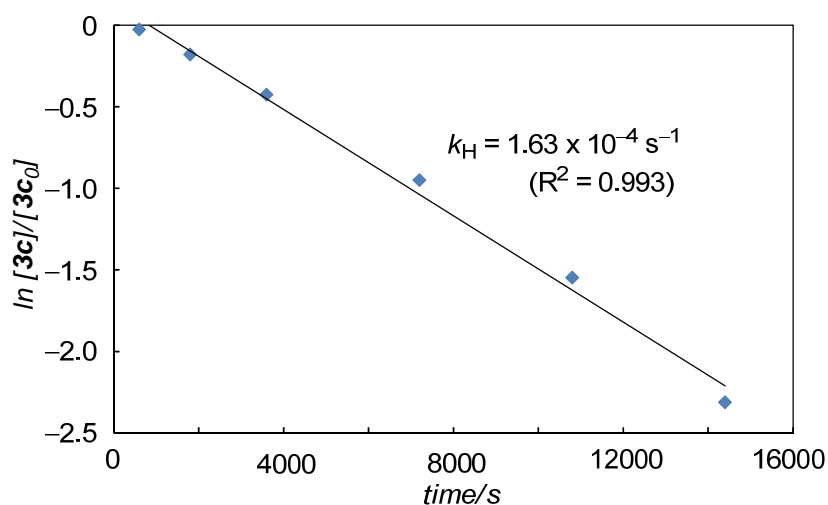

**Figure S2.** Plot of  $\ln [3c]/[3c_0]$  versus time for the conversion of **3c** to **2c** at 25 °C.

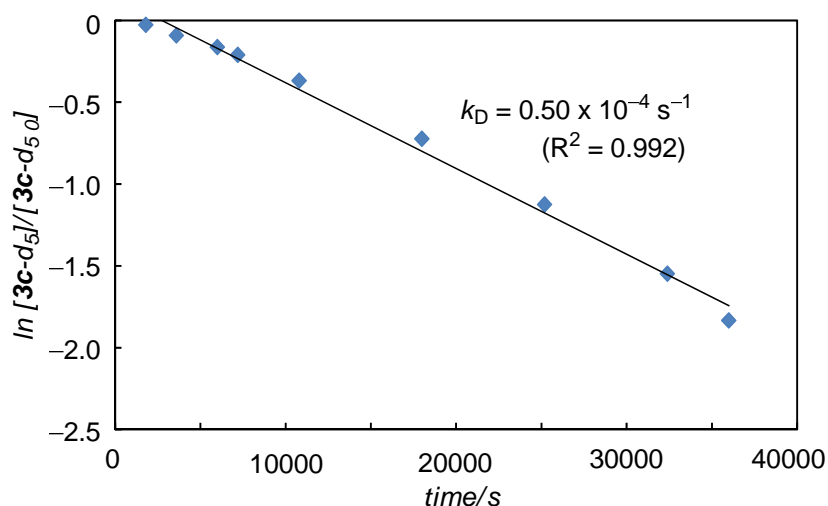

**Figure S3.** Plot of  $\ln [3c-d_5]/[3c-d_5]_0$  versus time for the conversion of **3c-d<sub>5</sub>** to **2c-d<sub>5</sub>** at 25 °C.

**X-ray Diffraction Studies.** Diffraction data for **2a**, **5a** and **6** were collected on a Rigaku Mercury CCD area detector with graphite-monochromated Mo K $\alpha$  radiation ( $\lambda = 0.71070$  Å) at  $-150$  °C. Intensity data were corrected for Lorenz-polarization effects and for empirical absorption (REQAB).<sup>6</sup> All calculations were performed using the *CrystalStructure*<sup>7</sup> crystallographic software package except for refinements, which were performed using SHELXL-97.<sup>8</sup> The positions of the non-hydrogen atoms were determined by direct methods (SIR-2008)<sup>9</sup> and subsequent Fourier syntheses (DIRDIF-99).<sup>10</sup> All non-hydrogen atoms were refined on  $F_o^2$  anisotropically by full-matrix least-square techniques. All hydrogen atoms were placed at the calculated positions with fixed isotropic parameters. Details of the X-ray diffraction study are summarized in Table S1.

**Table S1.** X-ray Crystallographic Data for **2a**, **5a** and **6**.

|                                                     | <b>2a</b>                                            | <b>5a</b>                                            | <b>6</b>                                              |
|-----------------------------------------------------|------------------------------------------------------|------------------------------------------------------|-------------------------------------------------------|
| CCDC                                                | 957816                                               | 957817                                               | 957818                                                |
| formula                                             | C <sub>75</sub> H <sub>55</sub> BF <sub>24</sub> PRh | C <sub>60</sub> H <sub>49</sub> BF <sub>24</sub> PRh | C <sub>82</sub> H <sub>59</sub> BF <sub>24</sub> OPRh |
| fw                                                  | 1556.91                                              | 1370.7                                               | 1661.02                                               |
| crystal dimension                                   | 0.43 × 0.32 × 0.30                                   | 0.35 × 0.35 × 0.20                                   | 0.42 × 0.22 × 0.17                                    |
| crystal system                                      | monoclinic                                           | triclinic                                            | monoclinic                                            |
| space group                                         | P2 <sub>1</sub> /n(#14)                              | P-1 (#2)                                             | P2 <sub>1</sub> /n(#14)                               |
| <i>a</i> , Å                                        | 14.906(3)                                            | 12.591(2)                                            | 13.909(3)                                             |
| <i>b</i> , Å                                        | 25.081(5)                                            | 15.472(3)                                            | 17.236(4)                                             |
| <i>c</i> , Å                                        | 18.215(3)                                            | 17.459(3)                                            | 31.046(7)                                             |
| <i>α</i> , deg                                      | 90                                                   | 65.085(5)                                            | 90                                                    |
| <i>β</i> , deg                                      | 92.956(2)                                            | 70.167(6)                                            | 91.043(3)                                             |
| <i>γ</i> , deg                                      | 90                                                   | 81.773(7)                                            | 90                                                    |
| <i>V</i> , Å <sup>3</sup>                           | 6801 (2)                                             | 2901.7(8)                                            | 7442 (3)                                              |
| <i>Z</i>                                            | 4                                                    | 2                                                    | 4                                                     |
| <i>ρ</i> <sub>calcd</sub> , g cm <sup>-3</sup>      | 1.521                                                | 1.569                                                | 1.482                                                 |
| <i>F</i> (000)                                      | 3144                                                 | 1380                                                 | 3360                                                  |
| <i>μ</i> , cm <sup>-1</sup>                         | 3.839                                                | 4.378                                                | 3.571                                                 |
| transmission factors                                |                                                      |                                                      |                                                       |
| range                                               | 0.857 – 0.891                                        | 0.807 – 0.916                                        | 0.901 – 0.941                                         |
| index range                                         |                                                      |                                                      |                                                       |
|                                                     | −19 ≤ <i>h</i> ≤ 16                                  | −16 ≤ <i>h</i> ≤ 16                                  | −17 ≤ <i>h</i> ≤ 18                                   |
|                                                     | −25 ≤ <i>k</i> ≤ 32                                  | −12 ≤ <i>k</i> ≤ 20                                  | −22 ≤ <i>k</i> ≤ 14                                   |
|                                                     | −21 ≤ <i>l</i> ≤ 23                                  | −20 ≤ <i>l</i> ≤ 22                                  | −39 ≤ <i>l</i> ≤ 40                                   |
| no. reflections                                     |                                                      |                                                      |                                                       |
| total                                               | 52317                                                | 22533                                                | 56972                                                 |
| unique ( <i>R</i> <sub>int</sub> )                  | 15429 (0.0720)                                       | 12848 (0.0408)                                       | 17012 (0.0883)                                        |
| <i>I</i> > 2σ( <i>I</i> )                           | 10917                                                | 10542                                                | 10495                                                 |
| no. parameters                                      | 920                                                  | 788                                                  | 991                                                   |
| <i>RI</i> ( <i>I</i> > 2σ( <i>I</i> )) <sup>a</sup> | 0.0694                                               | 0.0508                                               | 0.0883                                                |
| <i>wR2</i> (all data) <sup>b</sup>                  | 0.1796                                               | 0.1287                                               | 0.2398                                                |
| GOF <sup>c</sup>                                    | 1.028                                                | 1.101                                                | 1.025                                                 |
| max diff peak                                       |                                                      |                                                      |                                                       |
| / hole, e Å <sup>-3</sup>                           | 1.48/−0.85                                           | 0.90/−0.80                                           | 1.26/−0.68                                            |

<sup>a</sup>  $RI = \sum ||F_o| - |F_c|| / \sum |F_o|$ . <sup>b</sup>  $wR2 = [\sum \{w(F_o^2 - F_c^2)^2\} / \sum w(F_o^2)^2]^{1/2}$ ,  $w = 1/[\sigma^2 F_o^2 + (aP)^2 + bP]$  (*a* and *b* are constants suggested by the refinement program;  $P = [\max(F_o^2, 0) + 2F_c^2]/3$ ). <sup>c</sup>  $GOF = [\sum w(F_o^2 - F_c^2)^2 / (N_{obs} - N_{params})]^{1/2}$ .

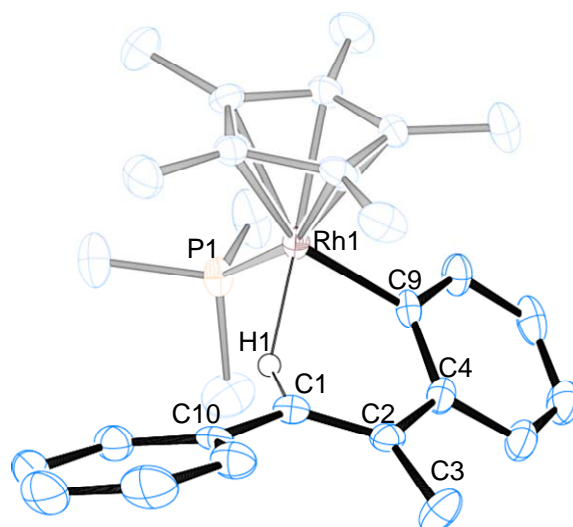

**Figure S4.** ORTEP drawing of **5a** (50% probability). Anionic part and hydrogen atoms except for H1 are omitted for clarity. Selected bond lengths (Å) and angles (deg): Rh1–P1, 2.3030(10); Rh1–C1, 2.475(5); Rh1–C9, 2.033(3); Rh1–H1, 1.753; C1–C2, 1.357(4); C1–C2–C3, 122.7(3); C1–C2–C4, 118.4(3); C3–C2–C4, 118.9(3); C2–C1–C10, 130.5(4).

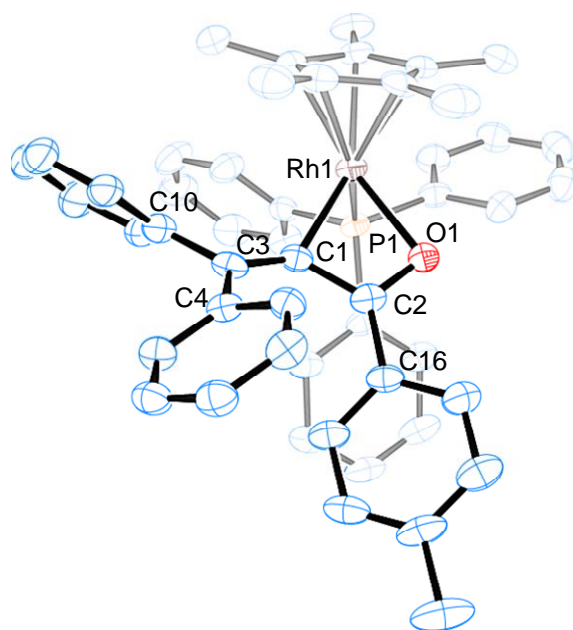

**Figure S5.** ORTEP drawing of **6** (50% probability). Anionic part and hydrogen atoms are omitted for clarity. Selected bond length (Å) and angles (deg): Rh1–O1, 2.141(4); Rh1–C1, 2.101(6); Rh1–P1, 2.3315(16); C1–C2, 1.449(8); C1–C3, 1.350(8); O1–C2, 1.285(7); O1–Rh1–C1, 64.32(18); Rh1–O1–C2, 93.6(3); Rh1–C1–C2, 90.6(4); Rh1–C1–C3, 134.3(4); C2–C1–C3, 130.0(6); O1–C2–C1, 111.2(5); O1–C2–C16, 117.8(5); C1–C2–C16, 130.8(6).

## References

- (1) (a) W. D. Jones and F. J. Feher, *Inorg. Chem.*, 1984, **23**, 2376; (b) W. D. Jones and V. L. Kuykendall, *Inorg. Chem.*, 1991, **30**, 2615.
- (2) (a) D. L. Reger, T. D. Wright, C. A. Little, J. J. S. Lamba and M. D. Smith, *Inorg. Chem.*, 2001, **40**, 3810; (b) D. L. Reger, C. A. Little, J. J. S. Lamba and K. J. Brown, *Inorg. Synth.*, 2004, **34**, 5; (c) C. R. Smith, A. Zhang, D. J. Mans and T. V. BajanBabu, *Org. Synth.*, 2008, **85**, 248.
- (3) S. Roy, M. P. Davydova, R. Pal K. Gilmore, G. A. Tolstikov, S. F. Vasilevsky and I. V. Alabugin, *J. Org. Chem.*, 2011, **76**, 7482.
- (4) Y. Shi, S. A. Blum, *Organometallics*, 2011, **30**, 1776.
- (5) (a) D. R. Stuart, P. Alsabeh, M. Kuhn and K. Fagnou, *J. Am. Chem. Soc.*, 2010, **132**, 18326; (b) T.-J. Gong, B. Xiao, Z.-J. Liu, J. Wan, J. Xu, D.-F. Luo, Y. Fu and L. Liu, *Org. Lett.*, 2011, **13**, 3235; (c) G. Song, X. Gong and X. Li, *J. Org. Chem.*, 2011, **76**, 7583; (d) C. Feng and T.-P. Loh, *Chem. Commun.*, 2011, **47**, 10458; (e) K.-H. Ng, Z. Zhou and W.-Y. Yu, *Org. Lett.*, 2012, **14**, 272.
- (6) R. A. Jacobson, *Private Communication to Rigaku Corp.*; *Rigaku Corp.*; Tokyo, Japan, 1998.
- (7) *CrystalStructure 4.0*: Single Crystal Structure Analysis Package; Rigaku Corporation: Tokyo, Japan, 2000–2010.
- (8) G. M. Sheldrick, *Acta Crystallogr., Sect A*, 2008, **64**, 112.
- (9) M. C. Burla, R. Caliendo, M. Camalli, B. Carrozzini, G. L. Cascarano, L. De Caro, C. Giacovazzo, G. Polidori, D. Siliqi and R. Spagna, *J. Appl. Crystallogr.*, 2007, **40**, 609.
- (10) P. T. Beurskens, G. Beurskens, R. de Gelder, S. García-Granda, R. O. Gould, R. Israël and J. M. M. Smits, *The DIRDIF-99 program system*; Crystallography Laboratory, University of Nijmegen, The Netherlands, 1999.
